# Supplementary material for: Prenatal Cannabis Use and Offspring Autism-Related Behaviors: Examining Maternal Stress as a Moderator in a Black American Cohort
Source: Springer Nature journal article supplement (doi:10.1007/s10803-023-05982-z), 2023-04-25
Supplement: MOESM2 [file 10803_2023_5982_MOESM2_ESM-1.pdf]

# Principal Components Analysis: All Prenatal Participants

## Total Variance Explained

| Component | Initial Eigenvalues |               |              | Extraction Sums of Squared Loadings |               |              | Rotation Sums of Squared Loadings <sup>a</sup> |
|-----------|---------------------|---------------|--------------|-------------------------------------|---------------|--------------|------------------------------------------------|
|           | Total               | % of Variance | Cumulative % | Total                               | % of Variance | Cumulative % |                                                |
| 1         | 4.510               | 34.691        | 34.691       | 4.510                               | 34.691        | 34.691       | 4.315                                          |
| 2         | 2.424               | 18.643        | 53.334       | 2.424                               | 18.643        | 53.334       | 2.510                                          |
| 3         | 1.337               | 10.287        | 63.621       | 1.337                               | 10.287        | 63.621       | 2.548                                          |
| 4         | .755                | 5.810         | 69.432       |                                     |               |              |                                                |
| 5         | .720                | 5.542         | 74.973       |                                     |               |              |                                                |
| 6         | .654                | 5.033         | 80.006       |                                     |               |              |                                                |
| 7         | .564                | 4.341         | 84.347       |                                     |               |              |                                                |
| 8         | .489                | 3.760         | 88.107       |                                     |               |              |                                                |
| 9         | .419                | 3.226         | 91.333       |                                     |               |              |                                                |
| 10        | .370                | 2.848         | 94.181       |                                     |               |              |                                                |
| 11        | .349                | 2.687         | 96.868       |                                     |               |              |                                                |
| 12        | .224                | 1.722         | 98.590       |                                     |               |              |                                                |
| 13        | .183                | 1.410         | 100.000      |                                     |               |              |                                                |

Extraction Method: Principal Component Analysis.

a. When components are correlated, sums of squared loadings cannot be added to obtain a total variance.

Scree Plot

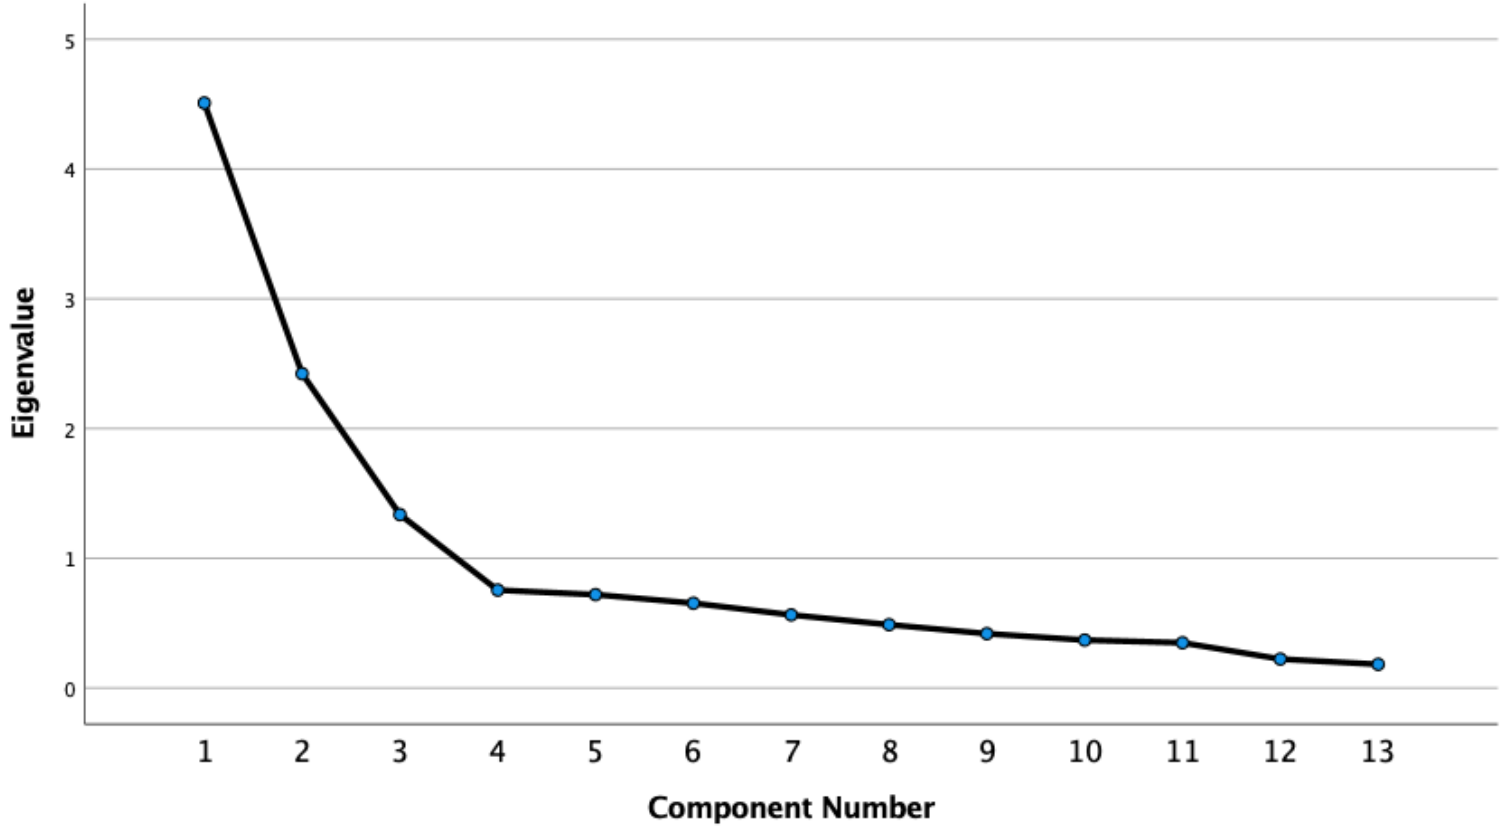

## Pattern Matrix<sup>a</sup>

|                                 | Component |      |      |
|---------------------------------|-----------|------|------|
|                                 | 1         | 2    | 3    |
| Marital Status                  |           | .641 |      |
| Education                       |           | .746 |      |
| Income                          |           | .853 |      |
| Insurance                       |           | .813 |      |
| PSS Visit 1                     | .770      |      |      |
| Edinburgh Visit 1               | .757      |      |      |
| STAI Visit 1                    | .815      |      |      |
| PSS Visit 2                     | .852      |      |      |
| Edinburgh Visit 2               | .774      |      |      |
| STAI Visit 2                    | .856      |      |      |
| ACES                            |           |      | .895 |
| CTQ                             |           |      | .596 |
| Stressful Life Events Inventory |           |      | .810 |

Extraction Method: Principal Component Analysis.

Rotation Method: Promax with Kaiser Normalization.<sup>a</sup>

a. Rotation converged in 4 iterations.
