# Supplementary material for: Prenatal Cannabis Use and Offspring Autism-Related Behaviors: Examining Maternal Stress as a Moderator in a Black American Cohort
Source: Springer Nature journal article supplement (doi:10.1007/s10803-023-05982-z), 2023-04-25

# Conceptual Model

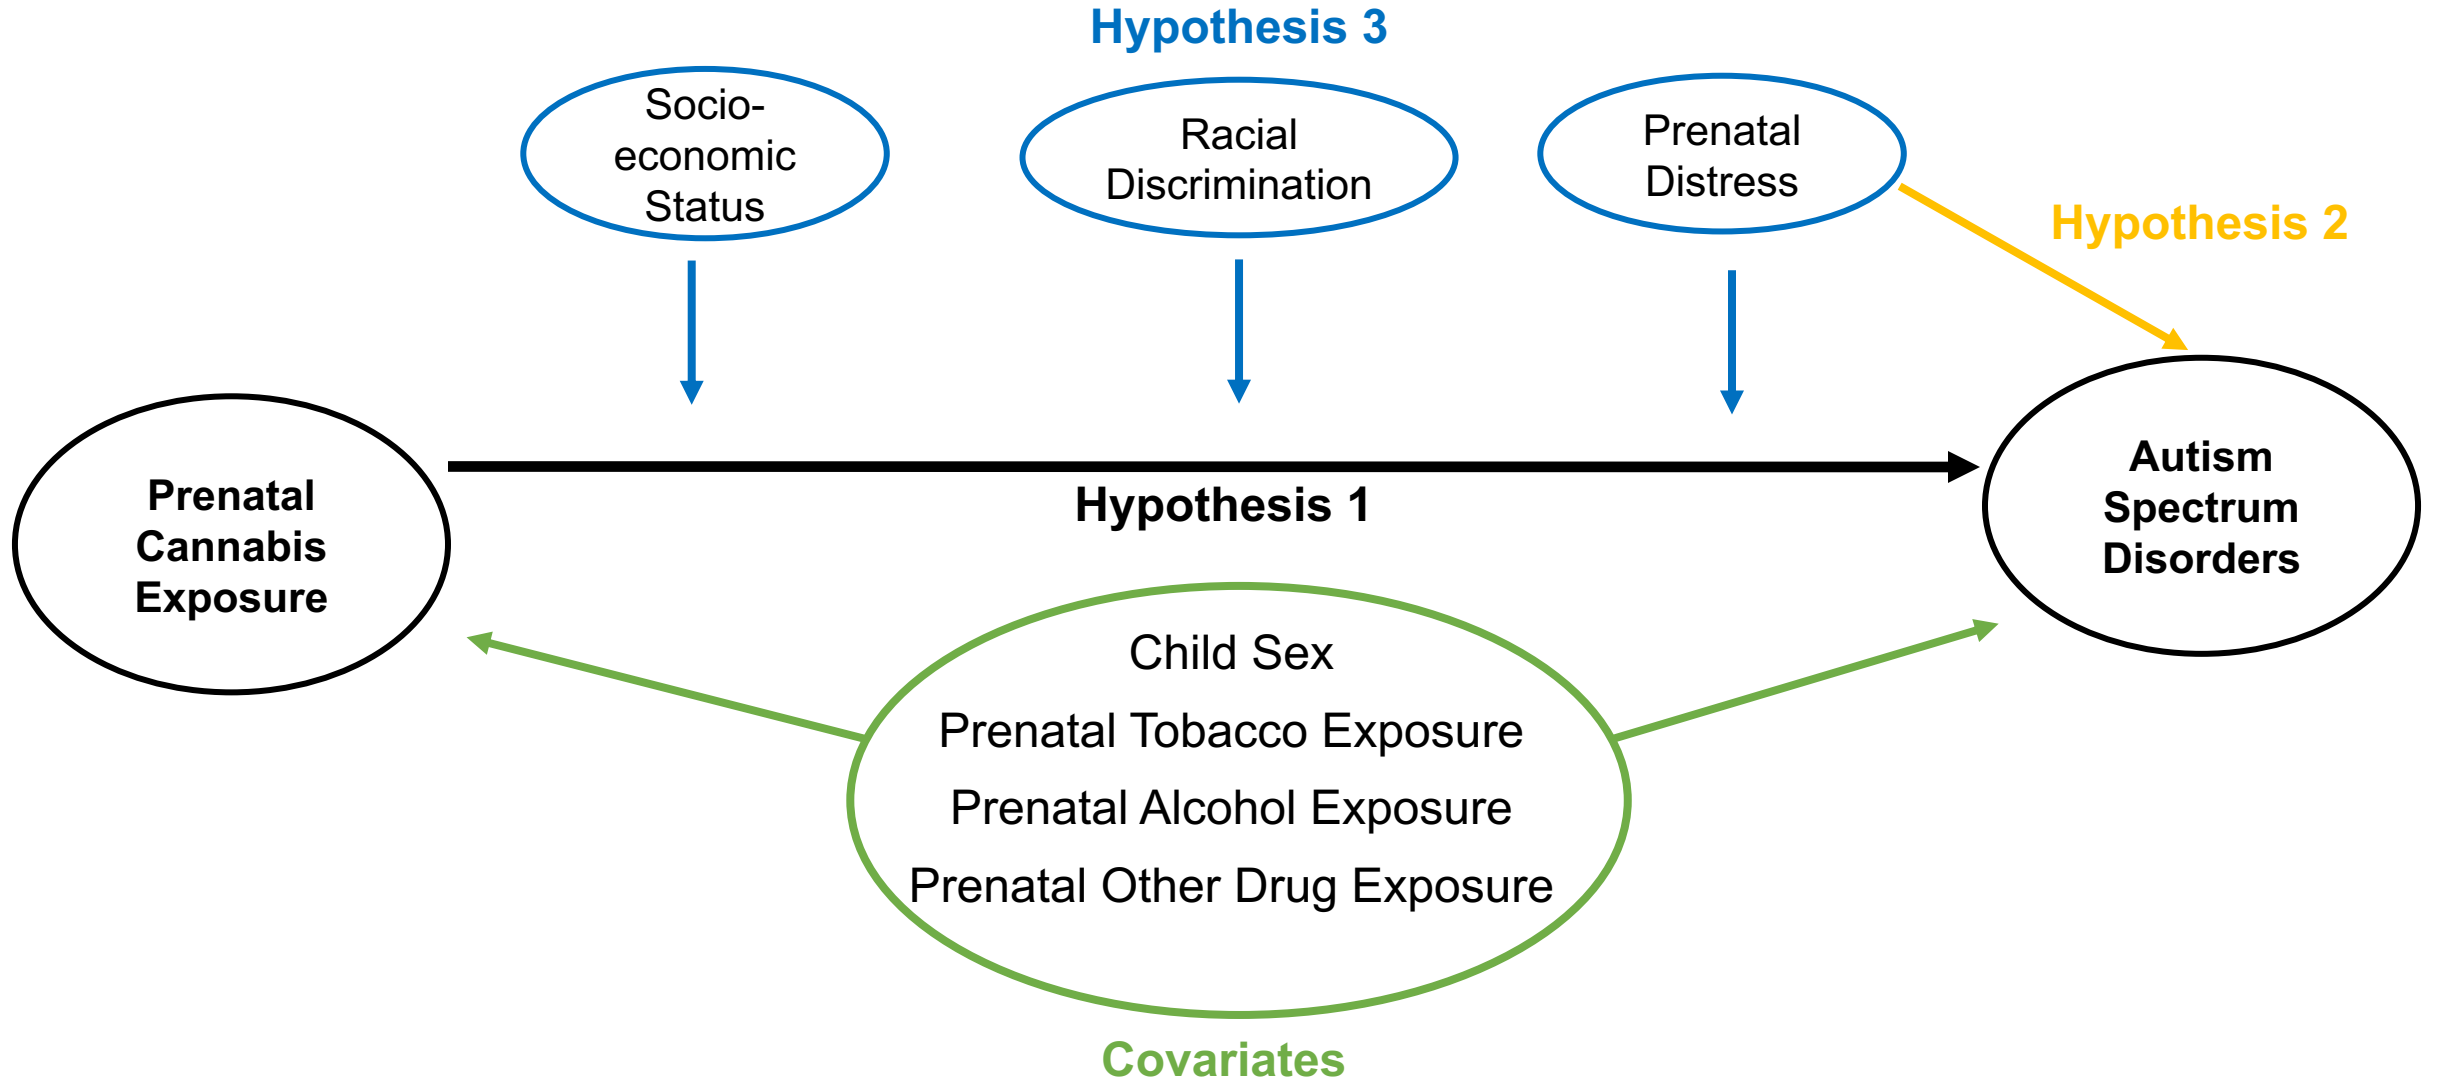

Supplement: MOESM3 [file 10803_2023_5982_MOESM3_ESM.pdf]
