# Supplementary material for: Prenatal Cannabis Use and Offspring Autism-Related Behaviors: Examining Maternal Stress as a Moderator in a Black American Cohort
Source: Springer Nature journal article supplement (doi:10.1007/s10803-023-05982-z), 2023-04-25
Supplement: MOESM4 [file 10803_2023_5982_MOESM4_ESM.pdf]

651 participants were recruited in the original prenatal study

181 participants completed the 2-year follow up study

181 participants had prenatal cannabis use data

164 participants  
had ADOS data

126 participants  
had M-CHAT data

171 participants  
had CBCL data

172 had ASD data on either the ADOS, M-CHAT, or CBCL
